# Supplementary material for: BMI1 enables interspecies chimerism with human pluripotent stem cells
Source: PubMed Central journal article supplement (PMC6220315; doi:10.1038/s41467-018-07098-w), 2018-11-07
Supplement: 41467_2018_7098_MOESM1_ESM.pdf [file 41467_2018_7098_MOESM1_ESM.pdf]

# Supplementary Figure 1

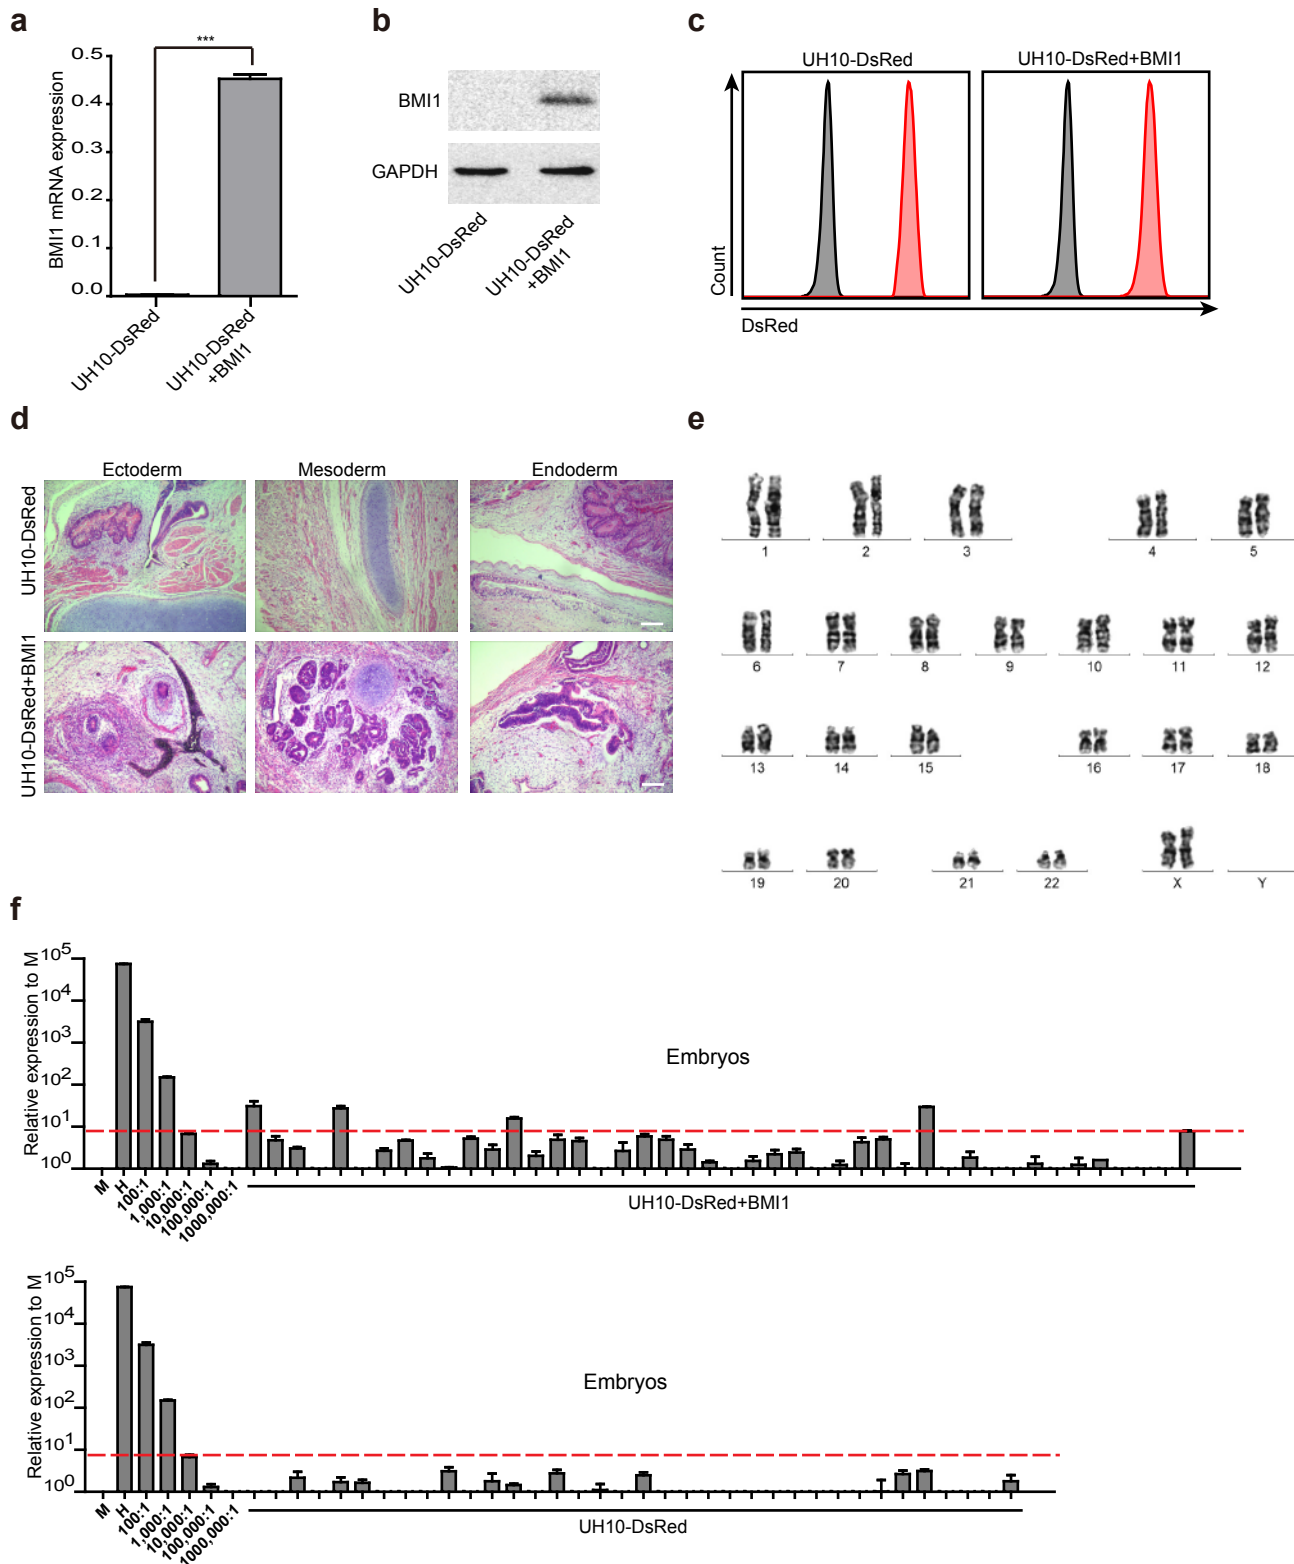

**Supplementary Figure 1 Identification of BMI1 expression and pluripotency of UH10-DsRed+BMI1. (a-b)** Quantitative PCR and western blot analysis of BMI1 expression of the indicated cells. Error bars represent mean + SEM of three independent replicates; \*\*\* $p < 0.001$ . **(c)** FACS analysis of the DsRed fluorescence of the indicated cells. **(d)** Hematoxylin and eosin (HE) staining of the teratoma formed by UH10-DsRed and UH10-DsRed+BMI1+DOX (+DOX means mice were fed with Dox (2mg/ml) containing water). Scale bars, 100  $\mu$ m. **(e)** Karyotype analysis of the UH10-DsRed+BMI1. **(f)** Quantitative genomic PCR analysis of the human mitochondria DNA in all recovered E10.5 mouse embryos after injection of the indicated cells.

# Supplementary Figure 2

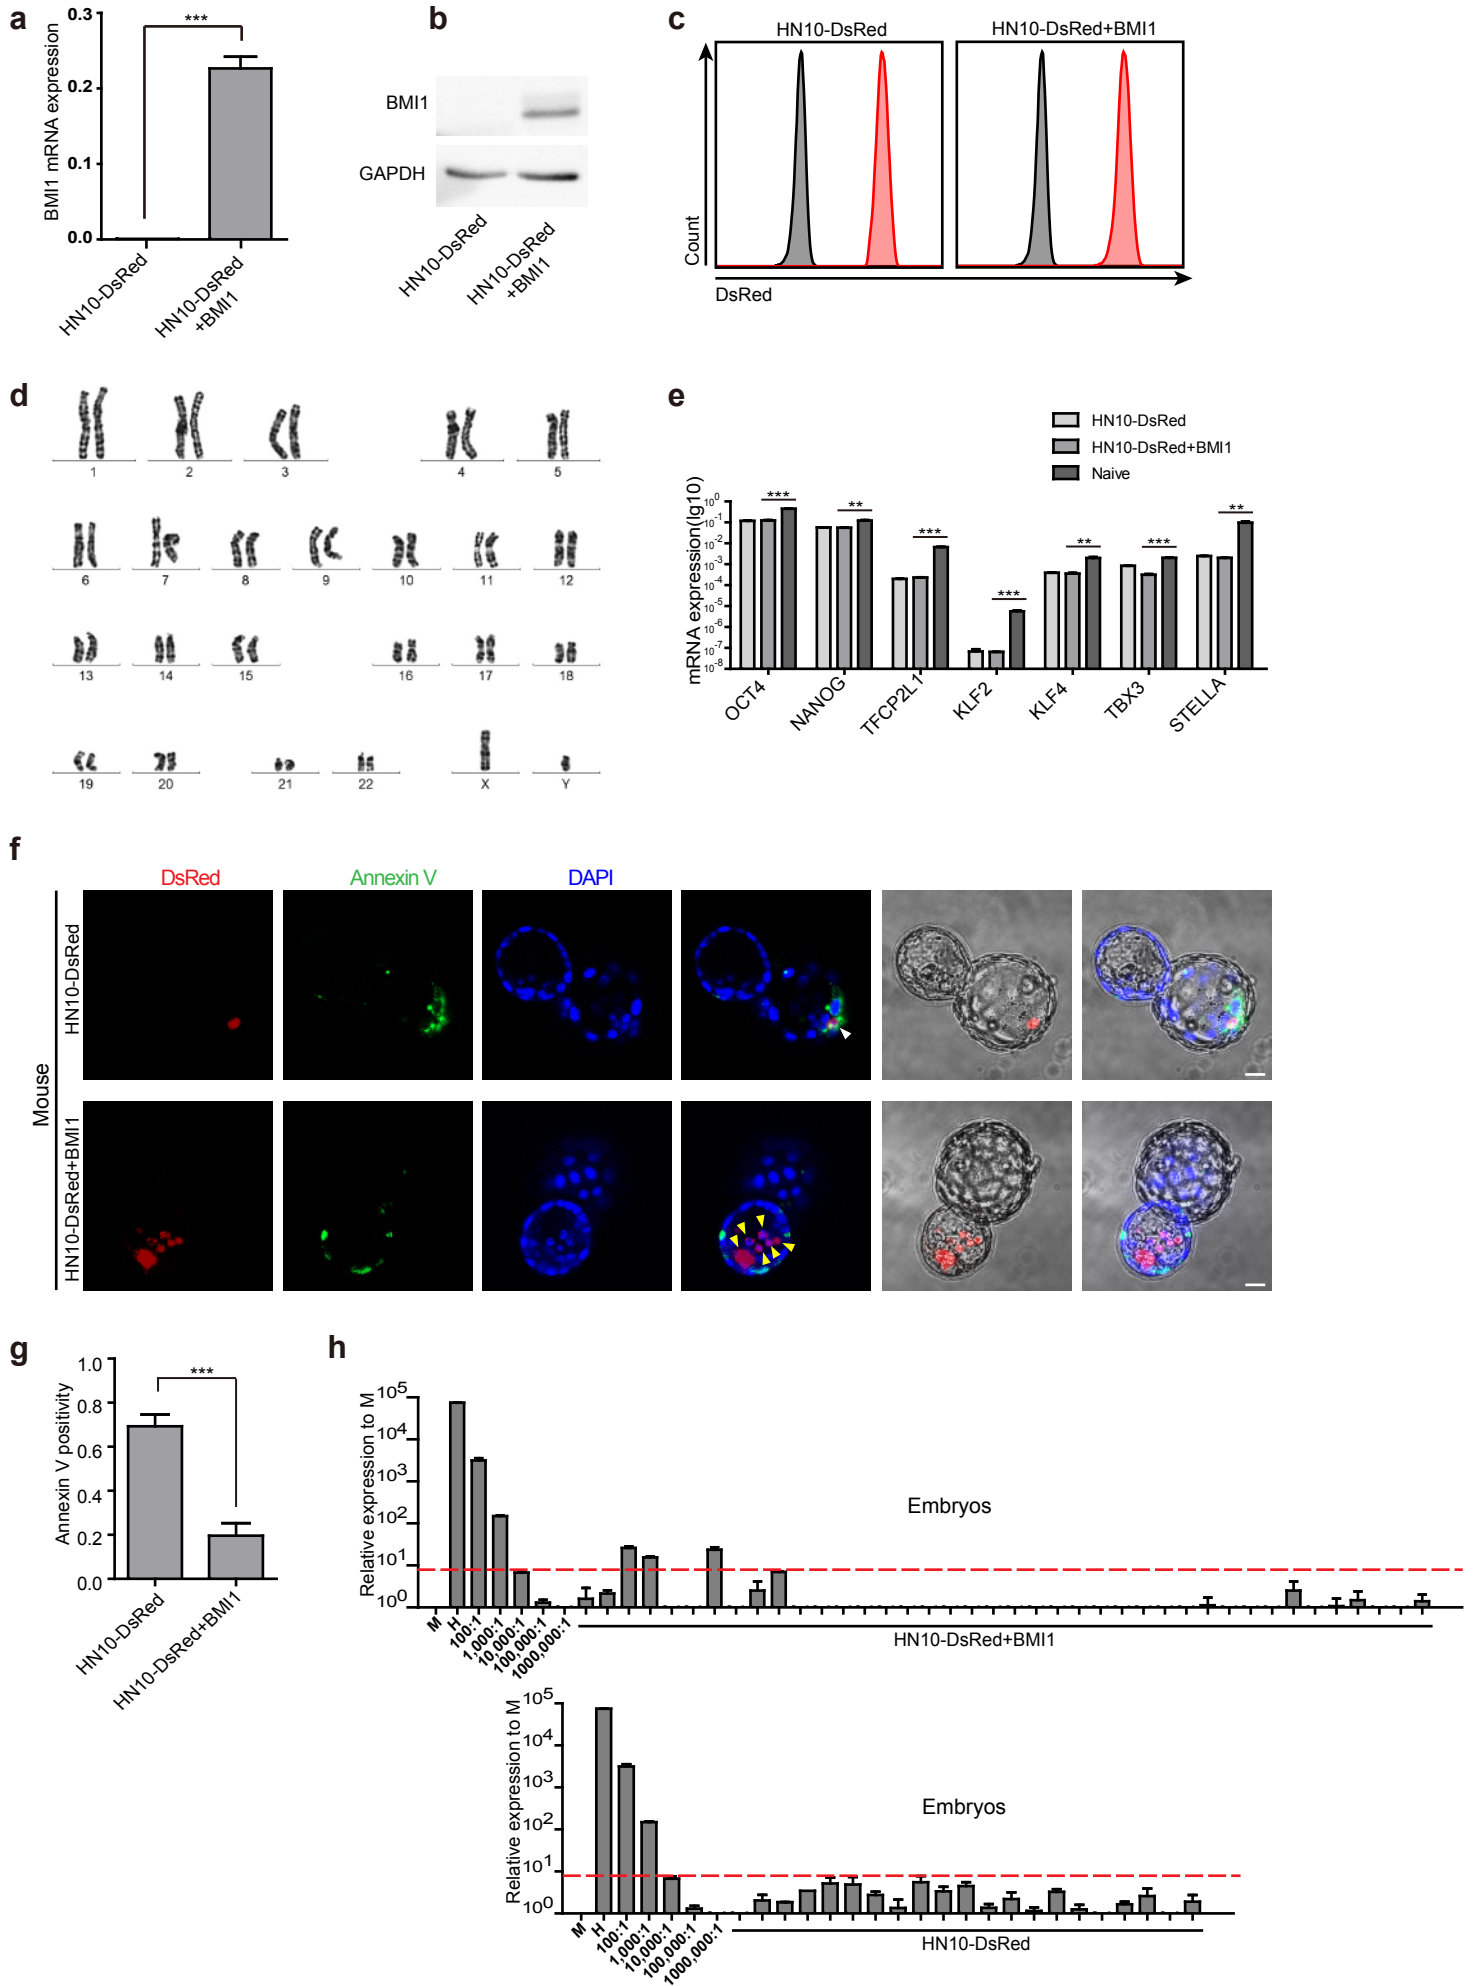

**Supplementary Figure 2 BMI1 enables chimera formation with the HN10 hESCs. (a-b)** Quantitative PCR and western blot analysis of BMI1 expression of HN10-DsRed and HN10-DsRed+BMI1. Error bars represent mean + SEM of three independent replicates; \*\*\* $p < 0.001$ . **(c)** FACS analysis of the DsRed fluorescence of the indicated cells. **(d)** Karyotype analysis of HN10-DsRed+BMI1. **(e)** RT-qPCR analysis of the naïve markers expression of the indicated cells. Error bars represent mean + SEM of three independent replicates; \*\* $p < 0.01$ , \*\*\* $p < 0.001$ . **(f)** Representative fluorescence images of mouse embryos stained with Annexin V after injection of 10 indicated DsRed<sup>+</sup> cells in later morulas or early blastocysts and 1-day culture *in vitro*. White arrow, DsRed<sup>+</sup>/Annexin V<sup>+</sup> cells; Yellow arrow, DsRed<sup>+</sup>/Annexin V<sup>-</sup> cells. Scale bars, 20  $\mu\text{m}$ . **(g)** Statistics of the percentage of engrafted DsRed<sup>+</sup> cells with Annexin V<sup>+</sup> in the mouse blastocysts; mean + SEM of 21 (HN10-DsRed) or 14 (HN10-DsRed+BMI1) samples, \*\*\* $p < 0.001$ . **(h)** Quantitative genomic PCR analysis of the human mitochondria DNA in all recovered E10.5 mouse embryos after injection of the indicated cells.

### Supplementary Figure 3

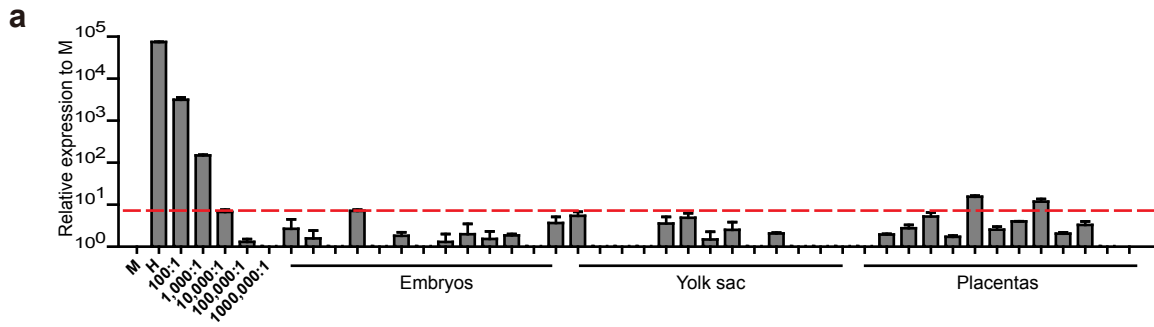

**b**

| Cell lines           | Stage of injection | Injected embryos | Dissected embryos | Positive embryos | Positive yolk sacs | Positive placentas | ExEm total | ExEm and Em |
|----------------------|--------------------|------------------|-------------------|------------------|--------------------|--------------------|------------|-------------|
| UH10-DsRed +BMI1-DOX | Morula/Blastocyst  | 34               | 13                | 1 (7.69%)        | 0 (0%)             | 2 (15.38%)         | 2 (15.38%) | 0           |

**Supplementary Figure 3 Temporal requirement for BMI1 in promoting chimera formation. (a)** Quantitative genomic PCR analysis and summary of the human mitochondria DNA in E10.5 mouse embryos, yolk sacs and placentas after injection of the indicated cells (UH10-DsRed+BMI1-DOX). **(b)** Summary of chimera assays of the indicated DsRed<sup>+</sup> cells injected at the later morula or early blastocyst stage. Addition of doxycycline in the water to the mouse surrogate mothers during day 0 to day 3 (at which point the transferred embryos developed to E6.5) after transfer of the indicated cells.

# Supplementary Figure 4

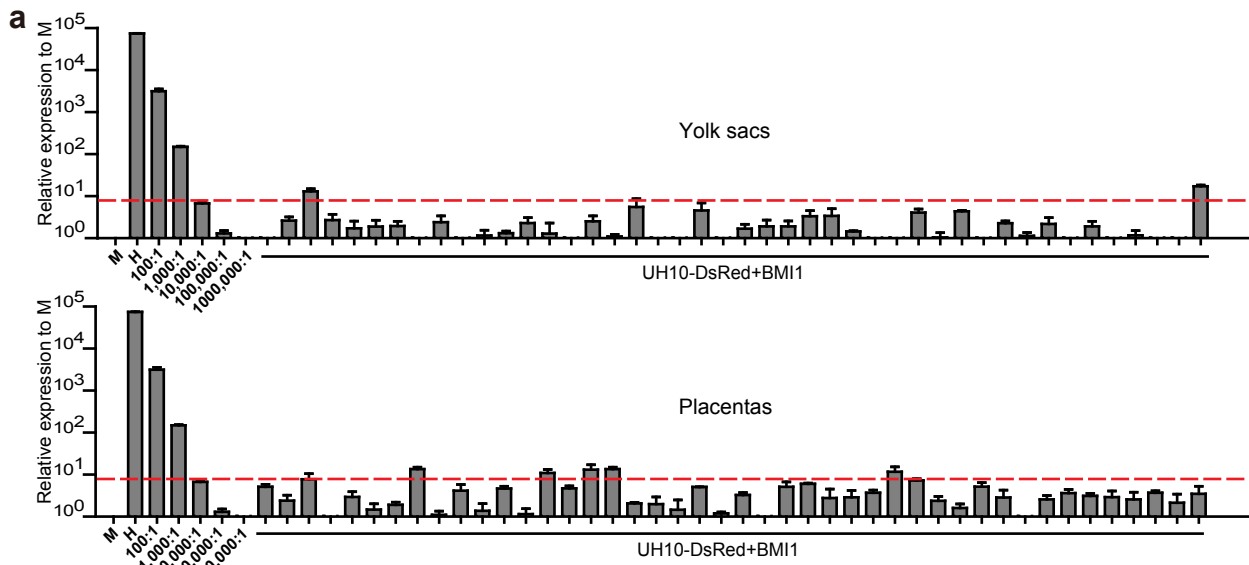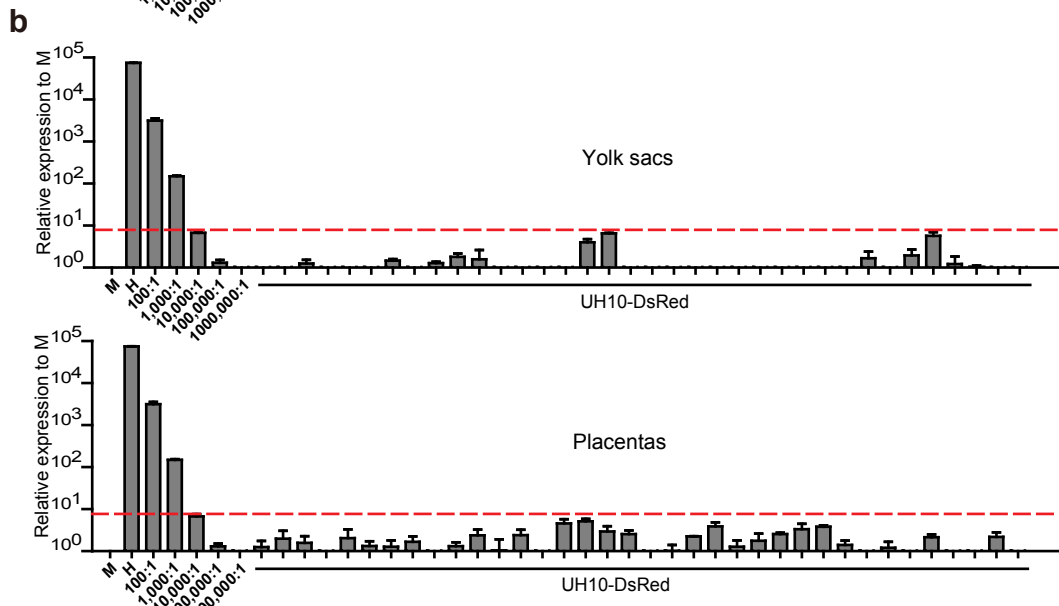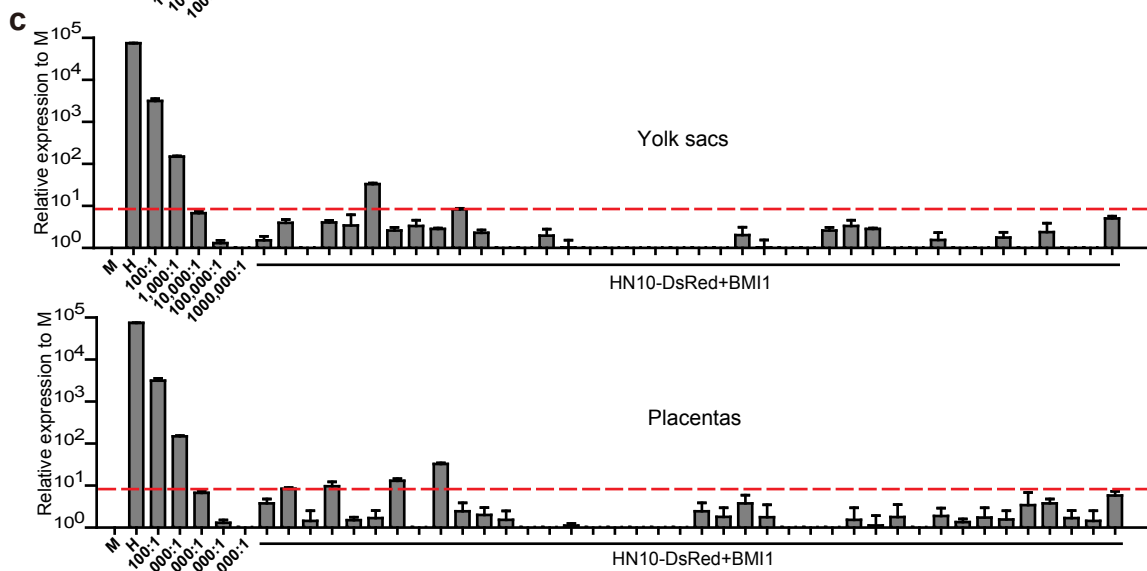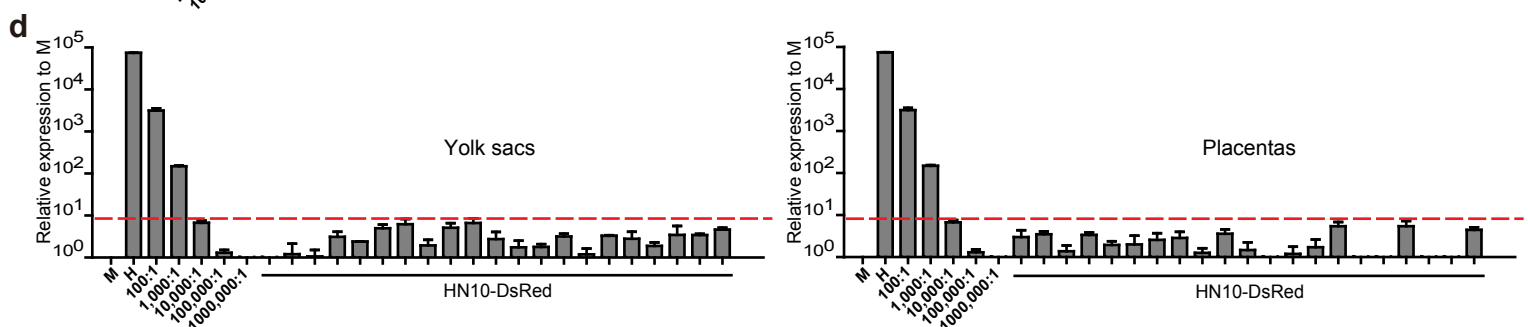

**Supplementary Figure 4 hPSCs with BMI1 expression contribute to extra-embryonic tissues in mouse chimera. (a-d)** Quantitative genomic PCR analysis of the human mitochondria DNA in all recovered E10.5 mouse yolk sacs and placentas after injection of the indicated cells.



# Supplementary Figure 5

**a**

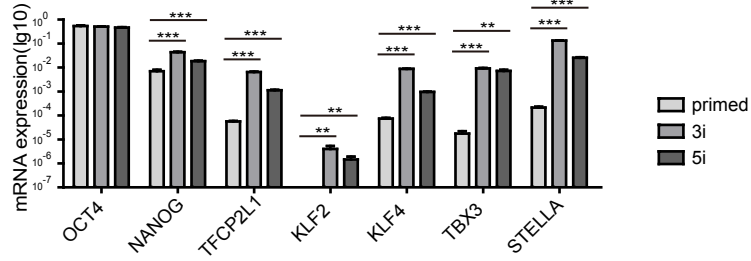

**b**

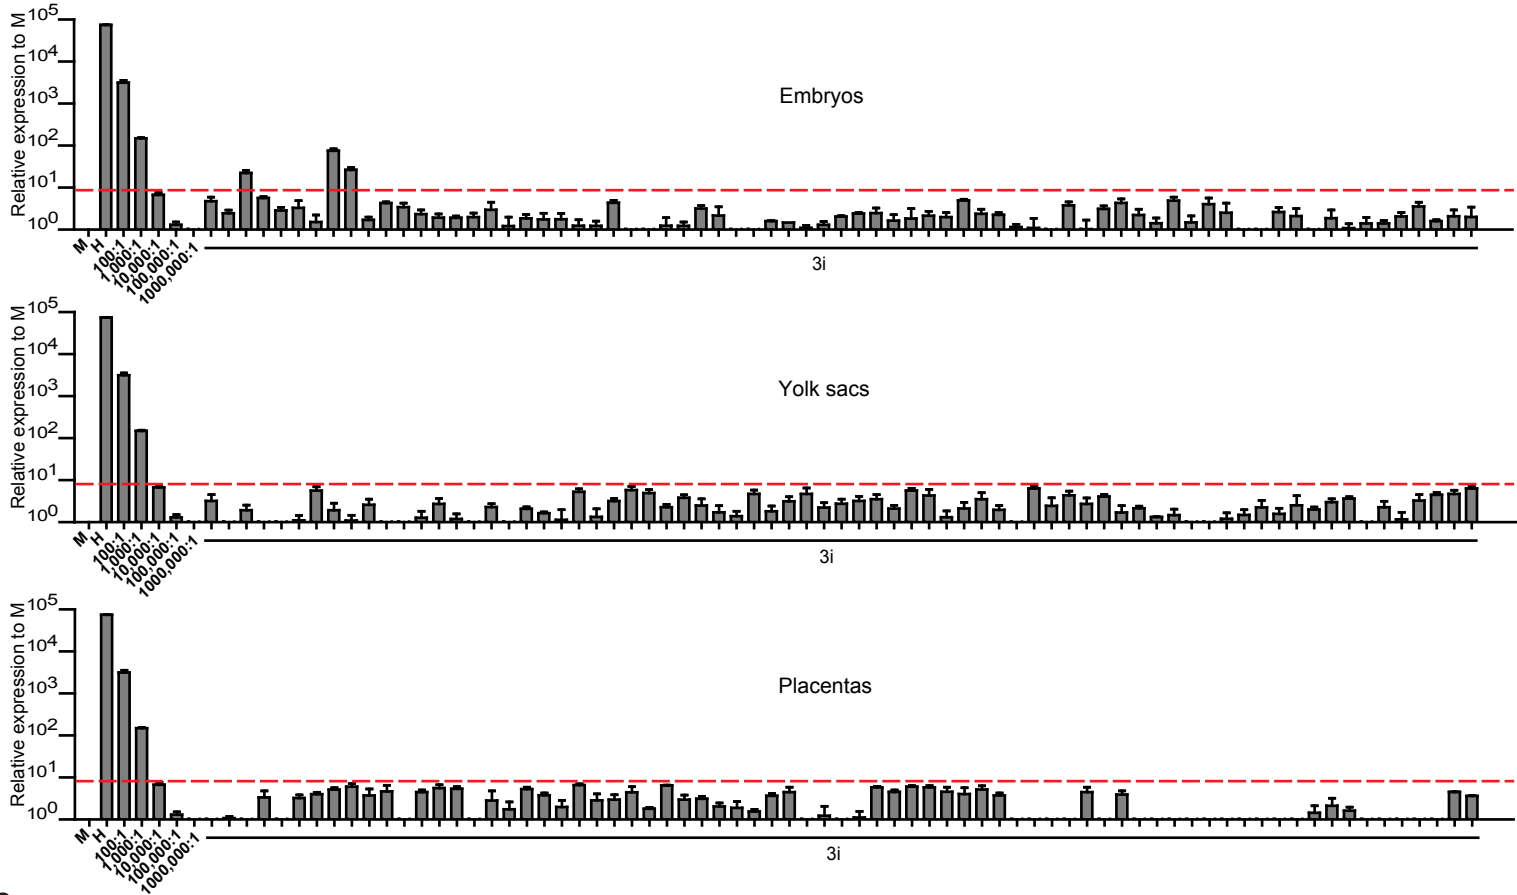

**c**

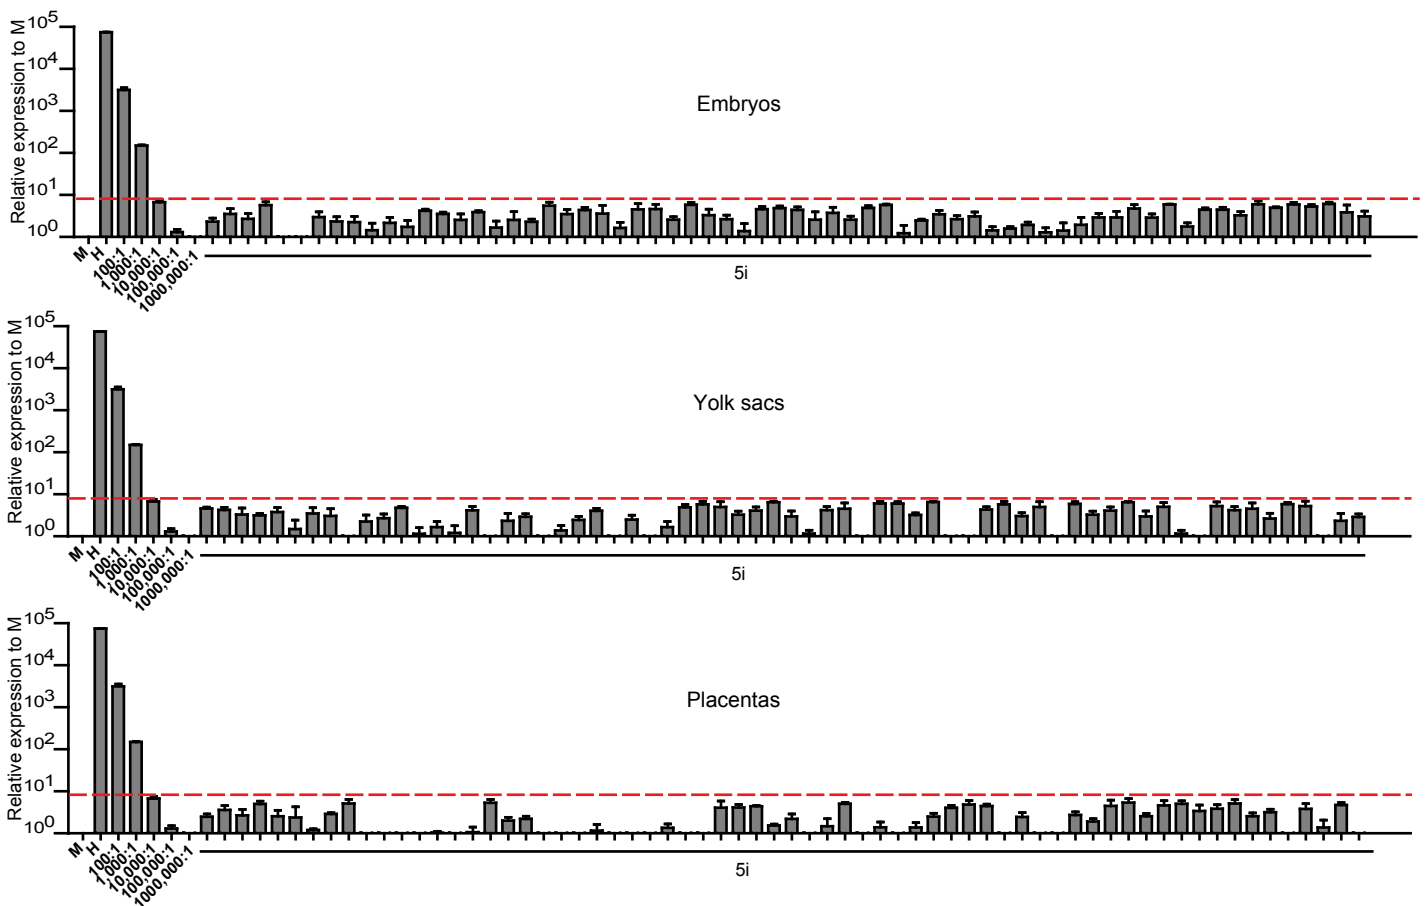

**Supplementary Figure 5 Apoptosis is a major barrier in interspecies chimerism with naive hPSCs. (a)** RT-qPCR analysis of the selected naïve state pluripotency markers in the indicated cells. Error bars represent mean + SEM of three independent replicates; \*\*p < 0.01, \*\*\*p < 0.001. **(b-c)** Quantitative genomic PCR analysis of the human mitochondria DNA in all recovered E10.5 mouse embryos, yolk sacs and placentas after injection of the 3i and 5i cells, respectively.

**Supplementary Table 1 Primers**

|           |                             |         |
|-----------|-----------------------------|---------|
| NANOG-R   | CCAGTGTCCAGACTGAAATTGAGT    | RT-qPCR |
| KLF4-F    | CAGCTTCACCTATCCGATCCG       | RT-qPCR |
| KLF4-R    | GACTCCCTGCCATAGAGGAGG       | RT-qPCR |
| TFCP2L1-F | CAGCCCGAGCACTACAACC         | RT-qPCR |
| TFCP2L1-R | CTCCCAGCTTCCGATTCTCC        | RT-qPCR |
| OCT4-F    | GCTCGAGAAGGATGTGGTCC        | RT-qPCR |
| OCT4-R    | CGTTGTGCATAGTCGCTGCT        | RT-qPCR |
| REX1-F    | GGAATGTGGGAAAGCGTTCGT       | RT-qPCR |
| REX1-R    | CCGTGTGGATGCGCACGT          | RT-qPCR |
| STELLA-F  | GTTACTGGGCGGAGTTCGTA        | RT-qPCR |
| STELLA-R  | TGAAGTGGCTTGGTGTCTTG        | RT-qPCR |
| GBX2-F    | CCGCCTTCAGCATAGACTCG        | RT-qPCR |
| GBX2-R    | GGTAGCCGGTGTAGACGAAAT       | RT-qPCR |
| SALL4-F   | AGCACATCAACTCGGAGGAG        | RT-qPCR |
| SALL4-R   | CATTCCCTGGGTGGTTCACTG       | RT-qPCR |
| TBX3-F    | GAGGCTAAAGAACTTTGGGATCA     | RT-qPCR |
| TBX3-R    | CATTTCTGGGGTTCGGCCTTA       | RT-qPCR |
| hmtDNA-F  | AATATTAACACAAACTACCACCTACCT | RT-qPCR |
| hmtDNA-R  | TGGTTCTCAGGGTTTGTATAA       | RT-qPCR |
| UCNE-F    | AACAATGGGTTCAGCTGCTT        | RT-qPCR |
| UCNE-R    | CCCAGGCGTATTTTTGTTCT        | RT-qPCR |

**Supplementary Table 2 Antibodies**

| Antibody                                               | Source                     | Cat.no    | Dilution Factor |
|--------------------------------------------------------|----------------------------|-----------|-----------------|
| Rabbit Anti-Human BMI1                                 | Cell Signaling Techenology | 5856      | 1: 1000         |
| DAPI                                                   | Sigma                      | D9542     | 1: 2000         |
| Mouse Anti-Human Stem121                               | Cellartic                  | Y40410    | 1: 500          |
| Rabbit Anti-Human Calponin                             | Abcam                      | AB46794   | 1: 500          |
| Rabbit Anti-Human PAX6                                 | Biolegend                  | 901301    | 1: 300          |
| Mouse Anti-Human SOX17                                 | R&D System                 | MAB1924   | 1: 200          |
| Mouse Anti-Human OCT4                                  | Santa Cruz Biotechnology   | sc-5279   | 1: 200          |
| Rabbit Anti-Human CDX2                                 | Cell Signaling Techenology | 3977      | 1: 200          |
| Mouse Anti-Human CK7                                   | Zsbio                      | ZM-0071   | 1: 200          |
| Rabbit Anti-TPBPA (Trophoblast specific protein alpha) | Abcam                      | ab104401  | 1: 1000         |
| HRP-conjugated Monoclonal Mouse Anti-GAPDH             | KangChen                   | KC-5G5    | 1: 1000         |
| Goat Anti-Rabbit IgG HRP                               | KangChen Bio-tech          | KC-RB-035 | 1: 4000         |
| Goat Anti-Mouse IgG (Alexa Fluor 488)                  | Abcam                      | ab150113  | 1: 500          |
| Goat Anti-Rabbit IgG (Alexa Fluor 488)                 | Thermo Fisher SCIENTIFIC   | A-11008   | 1: 500          |
| Goat Anti-Mouse IgG (Alexa Fluor 647)                  | Abcam                      | ab150115  | 1: 500          |
